# Supplementary material for: Electrochemical detection and catalytic reduction of nitrobenzene using a bimetallic NiS2/Fe3S4 magnetic heterostructure: an innovative approach for environmental remediation
Source: Royal Society of Chemistry journal article supplement (doi:10.1039/d3nj05947b), 2024-01-01
Supplement: d3nj05947b1.pdf [file d3nj05947b1.pdf]

### Supporting Information

#### **Electrochemical Detection and Catalytic Reduction of Nitrobenzene using Bimetallic NiS<sub>2</sub>/Fe<sub>3</sub>S<sub>4</sub> Magnetic Heterostructure: An Innovative Approach for Environmental Remediation**

Irfan Nazir<sup>a</sup>, Zia Ul Haq<sup>a</sup>, Arshid Bashir<sup>a</sup>, Aaliya Qureashi<sup>a</sup>, Firdous Ahmad Ganaie<sup>a</sup>, Kaniz Fatima, Sheikh Irfan<sup>b</sup>, Ghulam Nabi Dar<sup>b</sup>, Altaf Hussain Pandith<sup>a\*</sup>

<sup>a</sup> *Laboratory of Nanoscience and Quantum Computations, Department of Chemistry, University of Kashmir, Hazratbal, Srinagar-190006, Kashmir, India*

<sup>b</sup> *Nanophysics Research Laboratory, Department of Physics, University of Kashmir, Srinagar, J&K, India*

#### **Experimental Procedures**

##### **Instrumentation**

Different characterization techniques were used to analyze the material. Rigaku's Smart Lab X-ray diffractometer was used to carry out X-ray diffraction measurements. The surface morphology was studied using ZEISS Gemini SEM 500 FE-SEM, while the morphology was further studied by tunnelling electron microscopy Hitachi (H-7500). The elemental state and oxidation state was determined by X-ray photoelectron spectroscopy using Physical Electronics' (PHI 5000 Versa Probe III). Electrochemical behaviour was analyzed using a Biological SAS potentiostat SP-150 a three-electrode electrochemical set-up with Ag/AgCl as a reference electrode, platinum wire as the auxiliary electrode, and glassy carbon as the working electrode. BET surface area was measured using nitrogen adsorption/desorption on an ASAP 2460 analyzer (Micromeritics, USA). UV-Vis analysis was performed using the Shimadzu UV-Vis spectrophotometer.

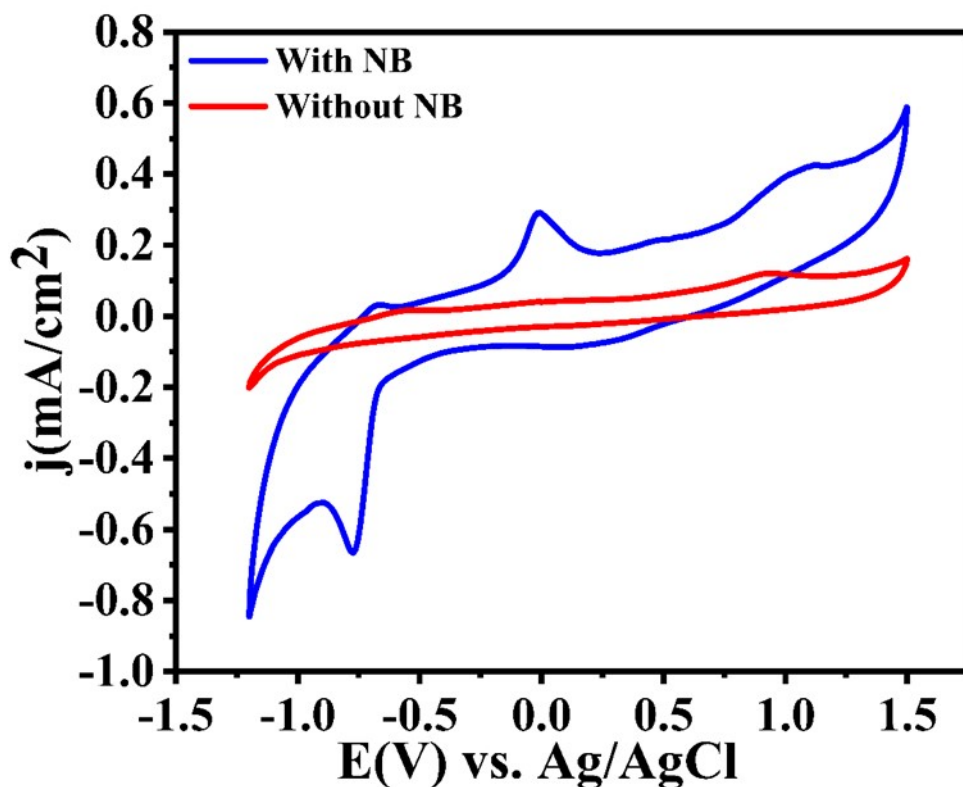

Fig. S1 CV of NiS<sub>2</sub>/Fe<sub>3</sub>S<sub>4</sub>/GCE with and without nitrobenzene

Table S1 Sensing of NB in the natural samples by using the sensor NiS<sub>2</sub>/ Fe<sub>3</sub>S<sub>4</sub>/GCE

| Sample | Nitrobenzene (Real) $\mu\text{A}$ | Before Spiking (Unspiked) $\mu\text{A}$ | After Spiking (Spiked) $\mu\text{A}$ | Recovery factor (%) |
|--------|-----------------------------------|-----------------------------------------|--------------------------------------|---------------------|
| Water  | -49.4                             | -169.8                                  | -221.7                               | 104                 |
| Honey  | -49.4                             | -161.1                                  | -209.1                               | 97                  |

We used the addition methodology to estimate the recovery factor using actual samples to validate the sensing platform. This spike/recovery method detects the trivial amounts of nitrobenzene in natural waters and honey. The recovery factor was estimated by Equation 1.

$$\frac{\text{Unspiked} - \text{Spiked}}{\text{Real}} \times 100 \quad (1)$$

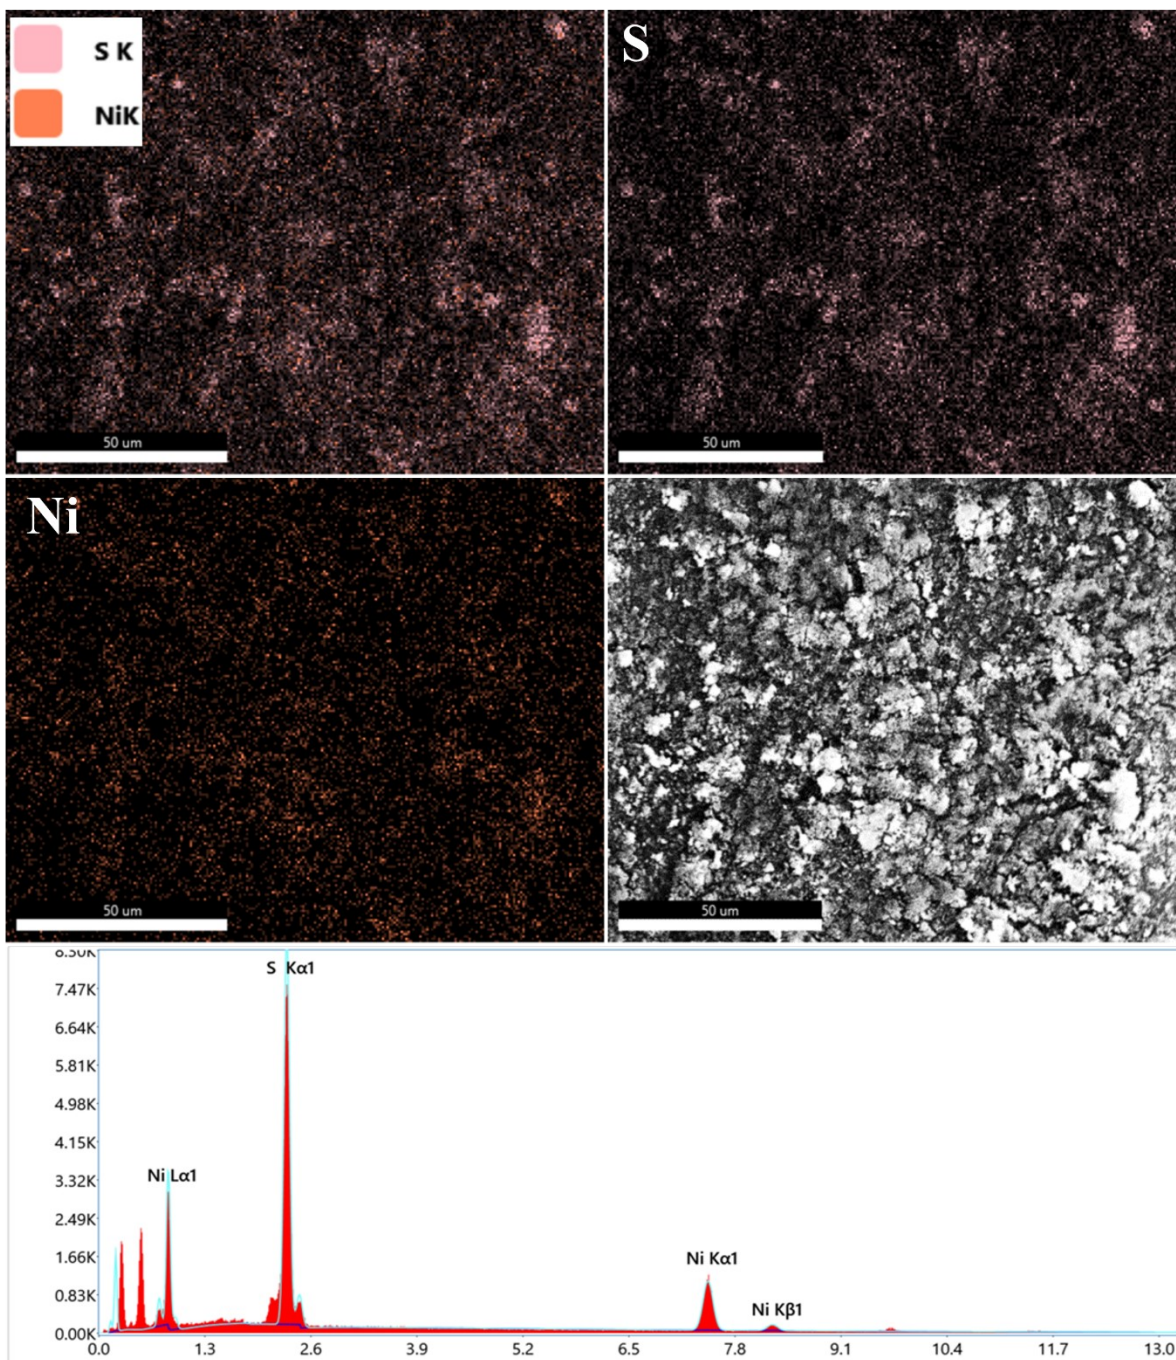

Fig.S2 elemental mapping and energy dispersive spectra of  $\text{NiS}_2$

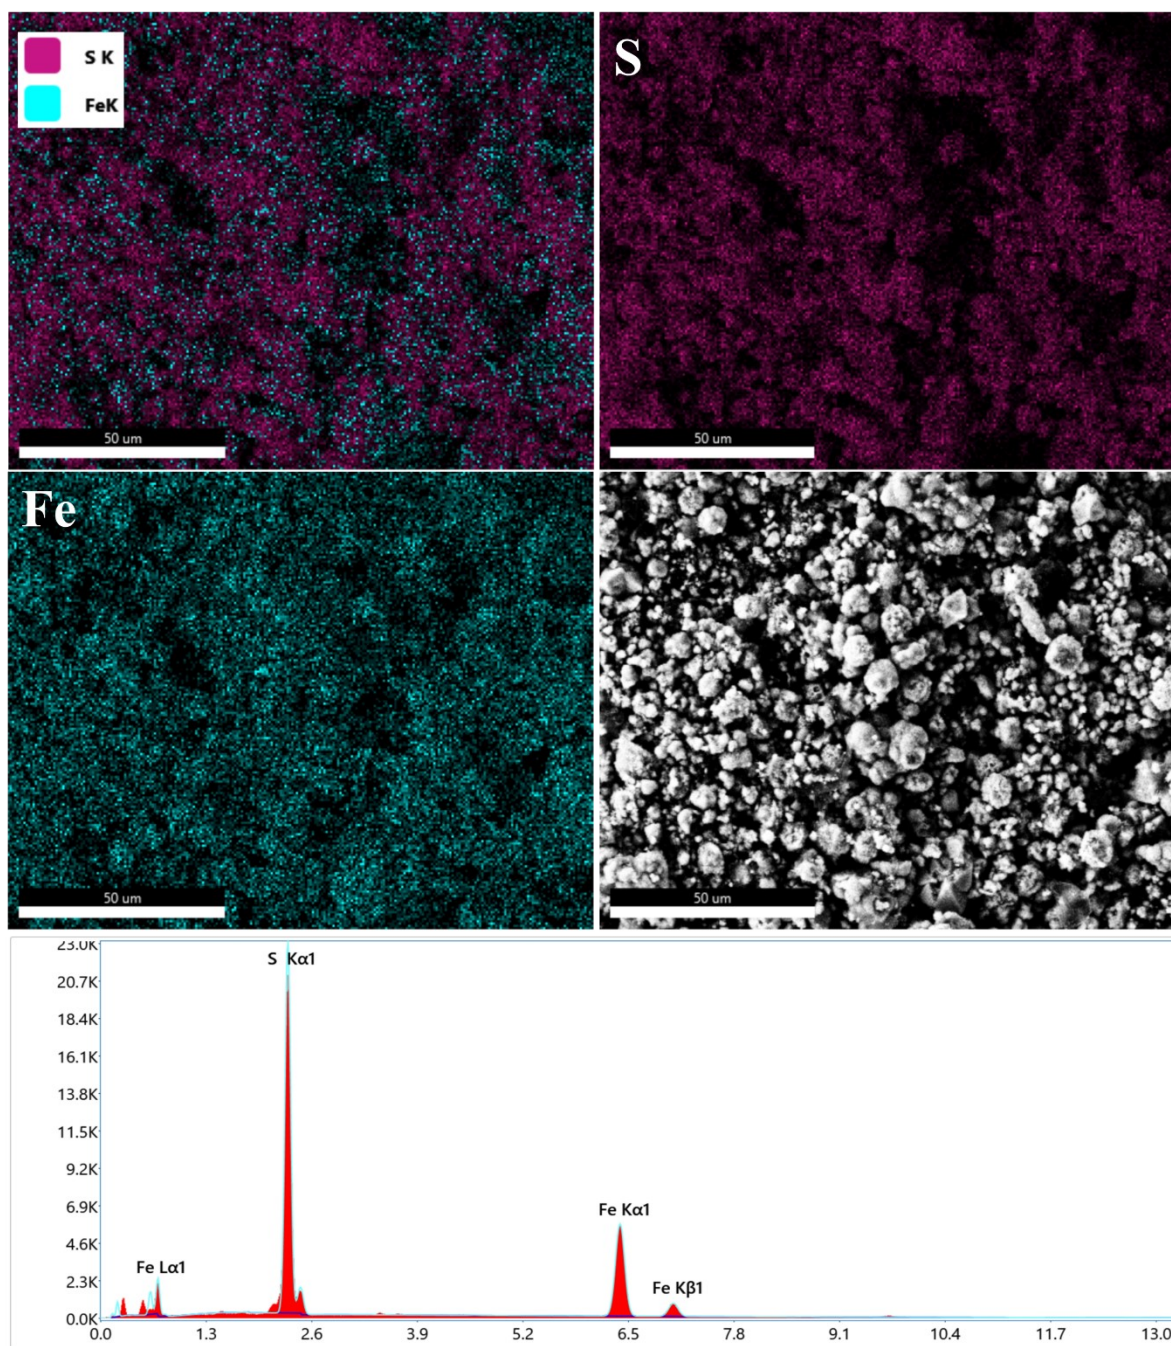

Fig.S3 elemental mapping and energy dispersive spectra of FeS<sub>2</sub>

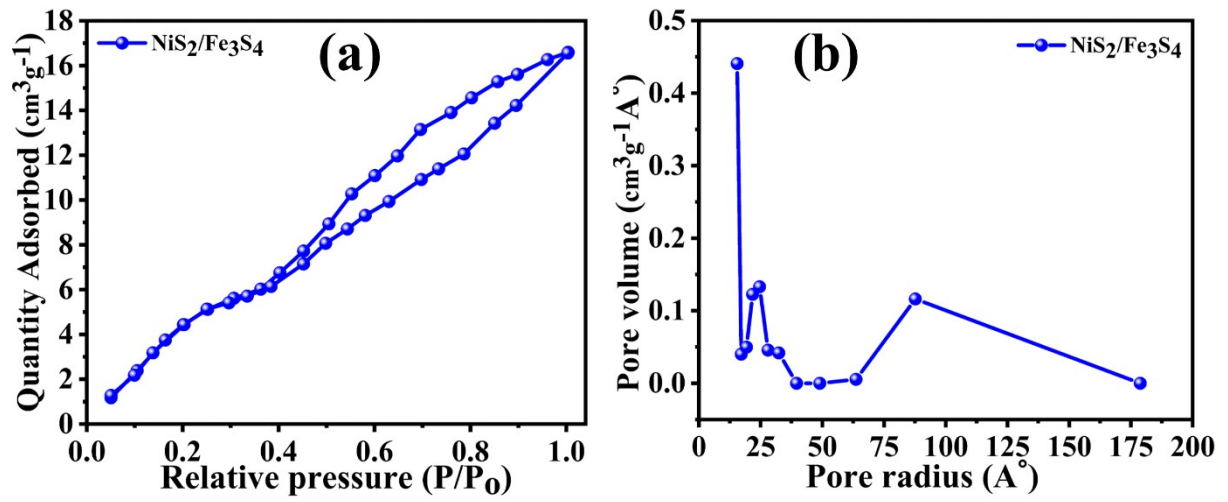

Fig.S4 (a) N<sub>2</sub> adsorption–desorption curve for  $\text{NiS}_2/\text{Fe}_3\text{S}_4$ . (b) Pore Distribution curve of  $\text{NiS}_2/\text{Fe}_3\text{S}_4$ .
